# Supplementary material for: An E280K Missense Variant in KCND3/Kv4.3—Case Report and Functional Characterization
Source: MDPI journal article supplement (doi:10.3390/ijms241310924), 2023-06-30
Supplement: s1 [file s1]

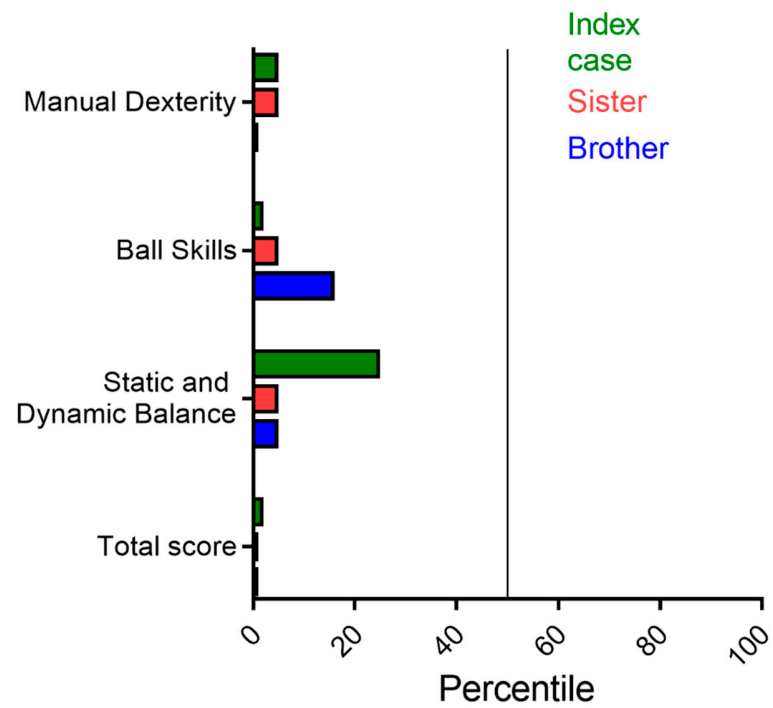

**Supplementary Figure S1.** Percentile scores for the three siblings in the Movement Assessment Battery for Children. Siblings were tested at five years of age.

**Supplementary Table S1.** Movement disorders screening panel.

| Gene     | Associated Phenotype description and OMIM disease ID*                                                                                                                                                     |
|----------|-----------------------------------------------------------------------------------------------------------------------------------------------------------------------------------------------------------|
| AARS2    | Combined oxidative phosphorylation deficiency 8, 614096<br>Leukoencephalopathy, progressive, with ovarian failure, 615889                                                                                 |
| ABCB7    | Anemia, sideroblastic, with ataxia, 301310                                                                                                                                                                |
| ABCD1    | Adrenomyeloneuropathy, adult, 300100<br>Adrenoleukodystrophy, 300100                                                                                                                                      |
| ABHD12   | Polyneuropathy, hearing loss, ataxia, retinitis pigmentosa, and cataract, 612674                                                                                                                          |
| ACTB     | ?Dystonia, juvenile-onset, 607371<br>Baraitser-Winter syndrome 1, 243310                                                                                                                                  |
| ADAR     | Dyschromatosis symmetrica hereditaria, 127400 Aicardi-Goutieres syndrome 6, 615010                                                                                                                        |
| ADCY5    | Dyskinesia, familial, with facial myokymia, 606703                                                                                                                                                        |
| ADGRG1   | Polymicrogyria, bilateral perisylvian, 615752<br>Polymicrogyria, bilateral frontoparietal, 606854                                                                                                         |
| ADPRS    | Neurodegeneration, childhood-onset, stress-induced, with variable ataxia and seizures, 618170                                                                                                             |
| AFG3L2   | Spastic ataxia 5, autosomal recessive, 614487<br>Optic atrophy 12, 618977<br>Spinocerebellar ataxia 28, 610246                                                                                            |
| AGA      | Aspartylglucosaminuria, 208400                                                                                                                                                                            |
| AGTPBP1  | Neurodegeneration, childhood-onset, with cerebellar atrophy, 618276                                                                                                                                       |
| AIMP1    | Leukodystrophy, hypomyelinating, 3, 260600                                                                                                                                                                |
| ALDH18A1 | Cutis laxa, autosomal recessive, type IIIA, 219150<br>Cutis laxa, autosomal dominant 3, 616603<br>Spastic paraplegia 9B, autosomal recessive, 616586<br>Spastic paraplegia 9A, autosomal dominant, 601162 |

|         |                                                                                                                                                                                                                                                             |
|---------|-------------------------------------------------------------------------------------------------------------------------------------------------------------------------------------------------------------------------------------------------------------|
| ALDH3A2 | Sjogren-Larsson syndrome, 270200                                                                                                                                                                                                                            |
| ALDH5A1 | Succinic semialdehyde dehydrogenase deficiency, 271980                                                                                                                                                                                                      |
| ALS2    | Primary lateral sclerosis, juvenile, 606353<br>Amyotrophic lateral sclerosis 2, juvenile, 205100<br>Spastic paralysis, infantile onset ascending, 607225                                                                                                    |
| AMPD2   | ?Spastic paraplegia 63, 615686<br>Pontocerebellar hypoplasia, type 9, 615809                                                                                                                                                                                |
| ANO10   | Spinocerebellar ataxia, autosomal recessive 10, 613728                                                                                                                                                                                                      |
| ANO3    | Dystonia 24, 615034                                                                                                                                                                                                                                         |
| AP4B1   | Spastic paraplegia 47, autosomal recessive, 614066                                                                                                                                                                                                          |
| AP4E1   | Stuttering, familial persistent, 1, 184450<br>Spastic paraplegia 51, autosomal recessive, 613744                                                                                                                                                            |
| AP4M1   | Spastic paraplegia 50, autosomal recessive, 612936                                                                                                                                                                                                          |
| AP4S1   | Spastic paraplegia 52, autosomal recessive, 614067                                                                                                                                                                                                          |
| APTX    | Ataxia, early-onset, with oculomotor apraxia and hypoalbuminemia, 208920                                                                                                                                                                                    |
| ARG1    | Argininemia, 207800                                                                                                                                                                                                                                         |
| ARSA    | Metachromatic leukodystrophy, 250100                                                                                                                                                                                                                        |
| ARX     | Lissencephaly, X-linked 2, 300215<br>Developmental and epileptic encephalopathy 1, 308350<br>Proud syndrome, 300004<br>Mental retardation, X-linked 29 and others, 300419<br>Partington syndrome, 309510<br>Hydranencephaly with abnormal genitalia, 300215 |
| ASPA    | Canavan disease, 271900                                                                                                                                                                                                                                     |
| ATCAY   | Ataxia, cerebellar, Cayman type, 601238                                                                                                                                                                                                                     |
| ATL1    | Spastic paraplegia 3A, autosomal dominant, 182600<br>Neuropathy, hereditary sensory, type ID, 613708                                                                                                                                                        |

|          |                                                                                                                                                                                                                                   |
|----------|-----------------------------------------------------------------------------------------------------------------------------------------------------------------------------------------------------------------------------------|
| ATM      | Ataxia-telangiectasia, 208900<br>{Breast cancer, susceptibility to}, 114480<br>Lymphoma, mantle cell, somatic, 0<br>Lymphoma, B-cell non-Hodgkin, somatic, 0<br>T-cell prolymphocytic leukemia, somatic, 0                        |
| ATP13A2  | Kufor-Rakeb syndrome, 606693<br>Spastic paraplegia 78, autosomal recessive, 617225                                                                                                                                                |
| ATP1A2   | Migraine, familial hemiplegic, 2, 602481<br>Migraine, familial basilar, 602481<br>Alternating hemiplegia of childhood 1, 104290                                                                                                   |
| ATP1A3   | CAPOS syndrome, 601338<br>Alternating hemiplegia of childhood 2, 614820<br>Dystonia-12, 128235                                                                                                                                    |
| ATP2B3   | ?Spinocerebellar ataxia, X-linked 1, 302500                                                                                                                                                                                       |
| ATP7B    | Wilson disease, 277900                                                                                                                                                                                                            |
| B4GALNT1 | Spastic paraplegia 26, autosomal recessive, 609195                                                                                                                                                                                |
| BCAP31   | Deafness, dystonia, and cerebral hypomyelination, 300475                                                                                                                                                                          |
| BCKDHA   | Maple syrup urine disease, type Ia, 248600                                                                                                                                                                                        |
| BCKDHB   | Maple syrup urine disease, type Ib, 248600                                                                                                                                                                                        |
| BCL11B   | Immunodeficiency 49, 617237<br>Intellectual developmental disorder with dysmorphic facies, speech delay, and T-cell abnormalities, 618092                                                                                         |
| BSCL2    | Neuropathy, distal hereditary motor, type VC, 619112<br>Lipodystrophy, congenital generalized, type 2, 269700<br>Silver spastic paraplegia syndrome, 270685<br>Encephalopathy, progressive, with or without lipodystrophy, 615924 |
| BTD      | Biotinidase deficiency, 253260                                                                                                                                                                                                    |
| C12orf65 | Spastic paraplegia 55, autosomal recessive, 615035<br>Combined oxidative phosphorylation deficiency 7, 613559                                                                                                                     |
| C19orf12 | Neurodegeneration with brain iron accumulation 4, 614298<br>?Spastic paraplegia 43, autosomal recessive, 615043                                                                                                                   |

|         |                                                                                                                                                                                                                                                                                             |
|---------|---------------------------------------------------------------------------------------------------------------------------------------------------------------------------------------------------------------------------------------------------------------------------------------------|
| CA8     | Cerebellar ataxia and mental retardation with or without quadrupedal locomotion 3, 613227                                                                                                                                                                                                   |
| CACNA1A | Spinocerebellar ataxia 6, 183086<br>Episodic ataxia, type 2, 108500<br>Migraine, familial hemiplegic, 1, 141500<br>Developmental and epileptic encephalopathy 42, 617106<br>Migraine, familial hemiplegic, 1, with progressive cerebellar ataxia, 141500                                    |
| CACNA1E | Developmental and epileptic encephalopathy 69, 618285                                                                                                                                                                                                                                       |
| CACNA1G | Spinocerebellar ataxia 42, 616795<br>Spinocerebellar ataxia 42, early-onset, severe, with neurodevelopmental deficits, 618087                                                                                                                                                               |
| CACNB4  | {Epilepsy, idiopathic generalized, susceptibility to, 9}, 607682<br>{Epilepsy, juvenile myoclonic, susceptibility to, 6}, 607682<br>Episodic ataxia, type 5, 613855                                                                                                                         |
| CAMTA1  | Cerebellar ataxia, nonprogressive, with mental retardation, 614756                                                                                                                                                                                                                          |
| CAPN1   | Spastic paraplegia 76, autosomal recessive, 616907                                                                                                                                                                                                                                          |
| CCT5    | Neuropathy, hereditary sensory, with spastic paraplegia, 256840                                                                                                                                                                                                                             |
| CHMP1A  | Pontocerebellar hypoplasia, type 8, 614961                                                                                                                                                                                                                                                  |
| CLCN2   | {Epilepsy, juvenile absence, susceptibility to, 2}, 607628<br>{Epilepsy, idiopathic generalized, susceptibility to, 11}, 607628<br>{Epilepsy, juvenile myoclonic, susceptibility to, 8}, 607628<br>Leukoencephalopathy with ataxia, 615651<br>Hyperaldosteronism, familial, type II, 605635 |
| CLCN4   | Raynaud-Claes syndrome, 300114                                                                                                                                                                                                                                                              |
| CLP1    | Pontocerebellar hypoplasia, type 10, 615803                                                                                                                                                                                                                                                 |
| CLPB    | 3-methylglutaconic aciduria, type VII, with cataracts, neurologic involvement and neutropenia, 616271                                                                                                                                                                                       |
| COASY   | Neurodegeneration with brain iron accumulation 6, 615643 Pontocerebellar hypoplasia, type 12, 618266                                                                                                                                                                                        |

|         |                                                                                                                                                                                                                                                                                                                                             |
|---------|---------------------------------------------------------------------------------------------------------------------------------------------------------------------------------------------------------------------------------------------------------------------------------------------------------------------------------------------|
| COL4A1  | Angiopathy, hereditary, with nephropathy, aneurysms, and muscle cramps, 611773<br>Brain small vessel disease with or without ocular anomalies, 175780<br>{Hemorrhage, intracerebral, susceptibility to}, 614519<br>?Retinal arteries, tortuosity of, 180000<br>Microangiopathy and leukoencephalopathy, pontine, autosomal dominant, 618564 |
| COL6A1  | Ullrich congenital muscular dystrophy 1, 254090<br>Bethlem myopathy 1, 158810                                                                                                                                                                                                                                                               |
| COL6A2  | Bethlem myopathy 1, 158810<br>Ullrich congenital muscular dystrophy 1,<br>254090 ?Myosclerosis, congenital, 255600                                                                                                                                                                                                                          |
| COL6A3  | Bethlem myopathy 1, 158810<br>Dystonia 27, 616411<br>Ullrich congenital muscular dystrophy 1, 254090                                                                                                                                                                                                                                        |
| COQ2    | {Multiple system atrophy, susceptibility to}, 146500<br>Coenzyme Q10 deficiency, primary, 1, 607426                                                                                                                                                                                                                                         |
| COQ4    | Coenzyme Q10 deficiency, primary, 7, 616276                                                                                                                                                                                                                                                                                                 |
| COQ8A   | Coenzyme Q10 deficiency, primary, 4, 612016                                                                                                                                                                                                                                                                                                 |
| COQ9    | Coenzyme Q10 deficiency, primary, 5, 614654                                                                                                                                                                                                                                                                                                 |
| COX20   | Mitochondrial complex IV deficiency, nuclear type 11, 619054                                                                                                                                                                                                                                                                                |
| CP      | [Hypoceruloplasminemia, hereditary], 604290<br>Hemosiderosis, systemic, due to aceruloplasminemia, 604290<br>Cerebellar ataxia, 604290                                                                                                                                                                                                      |
| CSF1R   | Brain abnormalities, neurodegeneration, and dysosteosclerosis, 618476 Leukoencephalopathy,<br>diffuse hereditary, with spheroids, 221820                                                                                                                                                                                                    |
| CSTB    | Epilepsy, progressive myoclonic 1A (Unverricht and Lundborg), 254800                                                                                                                                                                                                                                                                        |
| CTBP1   | Hypotonia, ataxia, developmental delay, and tooth enamel defect syndrome, 617915                                                                                                                                                                                                                                                            |
| CYP27A1 | Cerebrotendinous xanthomatosis, 213700                                                                                                                                                                                                                                                                                                      |
| CYP2U1  | Spastic paraplegia 56, autosomal recessive, 615030                                                                                                                                                                                                                                                                                          |
| CYP7B1  | Spastic paraplegia 5A, autosomal recessive, 270800<br>Bile acid synthesis defect, congenital, 3, 613812                                                                                                                                                                                                                                     |

|         |                                                                                                                                                                                                                         |
|---------|-------------------------------------------------------------------------------------------------------------------------------------------------------------------------------------------------------------------------|
| DARS1   | Hypomyelination with brainstem and spinal cord involvement and leg spasticity, 615281                                                                                                                                   |
| DARS2   | Leukoencephalopathy with brain stem and spinal cord involvement and lactate elevation, 611105                                                                                                                           |
| DBT     | Maple syrup urine disease, type II, 248600                                                                                                                                                                              |
| DCAF17  | Woodhouse-Sakati syndrome, 241080                                                                                                                                                                                       |
| DCC     | Esophageal carcinoma, somatic, 133239<br>Gaze palsy, familial horizontal, with progressive scoliosis, 2, 617542<br>Mirror movements 1 and/or agenesis of the corpus callosum, 157600 Colorectal cancer, somatic, 114500 |
| DCTN1   | {Amyotrophic lateral sclerosis, susceptibility to}, 105400<br>Perry syndrome, 168605<br>Neuronopathy, distal hereditary motor, type VIIB, 607641                                                                        |
| DDC     | Aromatic L-amino acid decarboxylase deficiency, 608643                                                                                                                                                                  |
| DDHD1   | Spastic paraplegia 28, autosomal recessive, 609340                                                                                                                                                                      |
| DDHD2   | Spastic paraplegia 54, autosomal recessive, 615033                                                                                                                                                                      |
| DHDDS   | Retinitis pigmentosa 59, 613861<br>Developmental delay and seizures with or without movement abnormalities, 617836 ?Congenital disorder of glycosylation, type 1bb, 613861                                              |
| DLAT    | Pyruvate dehydrogenase E2 deficiency, 245348                                                                                                                                                                            |
| DLD     | Dihydrolipoamide dehydrogenase deficiency, 246900                                                                                                                                                                       |
| DNAJC12 | Hyperphenylalaninemia, mild, non-BH4-deficient, 617384                                                                                                                                                                  |
| DNAJC3  | ?Ataxia, combined cerebellar and peripheral, with hearing loss and diabetes mellitus, 616192                                                                                                                            |
| DNAL4   | ?Mirror movements 3, 616059                                                                                                                                                                                             |
| DNM1L   | Encephalopathy, lethal, due to defective mitochondrial peroxisomal fission 1, 614388<br>Optic atrophy 5, 610708                                                                                                         |
| DNMT1   | Cerebellar ataxia, deafness, and narcolepsy, autosomal dominant, 604121 Neuropathy, hereditary sensory, type IE, 614116                                                                                                 |
| DPYS    | Dihydropyrimidinuria, 222748                                                                                                                                                                                            |

|         |                                                                                                                                      |
|---------|--------------------------------------------------------------------------------------------------------------------------------------|
| ECHS1   | Mitochondrial short-chain enoyl-CoA hydratase 1 deficiency, 616277                                                                   |
| EIF2B1  | Leukoencephalopathy with vanishing white matter, 603896                                                                              |
| EIF2B2  | Ovarioleukodystrophy, 603896<br>Leukoencephalopathy with vanishing white matter, 603896                                              |
| EIF2B3  | Leukoencephalopathy with vanishing white matter, 603896                                                                              |
| EIF2B4  | Leukoencephalopathy with vanishing white matter, 603896<br>Ovarioleukodystrophy, 603896                                              |
| EIF2B5  | Leukoencephalopathy with vanishing white matter, 603896<br>Ovarioleukodystrophy, 603896                                              |
| ELOVL4  | Spinocerebellar ataxia 34, 133190<br>Stargardt disease 3, 600110<br>Ichthyosis, spastic quadriplegia, and mental retardation, 614457 |
| ELOVL5  | Spinocerebellar ataxia 38, 615957                                                                                                    |
| ERLIN2  | Spastic paraplegia 18, autosomal recessive, 611225                                                                                   |
| ETHE1   | Ethylmalonic encephalopathy, 602473                                                                                                  |
| EXOSC3  | Pontocerebellar hypoplasia, type 1B, 614678                                                                                          |
| EXOSC5  | No OMIM disease ID                                                                                                                   |
| EXOSC8  | Pontocerebellar hypoplasia, type 1C, 616081                                                                                          |
| EXOSC9  | Pontocerebellar hypoplasia, type 1D, 618065                                                                                          |
| FA2H    | Spastic paraplegia 35, autosomal recessive, 612319                                                                                   |
| FAM126A | Leukodystrophy, hypomyelinating, 5, 610532                                                                                           |
| FAR1    | Peroxisomal fatty acyl-CoA reductase 1 disorder, 616154                                                                              |
| FARS2   | Spastic paraplegia 77, autosomal recessive, 617046<br>Combined oxidative phosphorylation deficiency 14, 614946                       |
| FBXO7   | Parkinson disease 15, autosomal recessive, 260300                                                                                    |
| FGF14   | Spinocerebellar ataxia 27, 609307                                                                                                    |



|        |                                                                                                                                                                                                                                                                                                              |
|--------|--------------------------------------------------------------------------------------------------------------------------------------------------------------------------------------------------------------------------------------------------------------------------------------------------------------|
| FLVCR1 | Ataxia, posterior column, with retinitis pigmentosa, 609033                                                                                                                                                                                                                                                  |
| FOLR1  | Neurodegeneration due to cerebral folate transport deficiency, 613068                                                                                                                                                                                                                                        |
| FRMD7  | Nystagmus 1, congenital, X-linked, 310700<br>Nystagmus, infantile periodic alternating, X-linked, 310700                                                                                                                                                                                                     |
| FTL    | Hyperferritinemia-cataract syndrome, 600886<br>Neurodegeneration with brain iron accumulation 3, 606159 L-ferritin deficiency, dominant and recessive, 615604                                                                                                                                                |
| GALC   | Krabbe disease, 245200                                                                                                                                                                                                                                                                                       |
| GAN    | Giant axonal neuropathy-1, 256850                                                                                                                                                                                                                                                                            |
| GBA    | Gaucher disease, type III, 231000<br>{Parkinson disease, late-onset, susceptibility to}, 168600<br>Gaucher disease, type IIIC, 231005<br>Gaucher disease, type I, 230800<br>Gaucher disease, perinatal lethal, 608013<br>Gaucher disease, type II, 230900<br>{Lewy body dementia, susceptibility to}, 127750 |
| GBA2   | Spastic paraplegia 46, autosomal recessive, 614409                                                                                                                                                                                                                                                           |
| GBE1   | Polyglucosan body disease, adult form, 263570<br>Glycogen storage disease IV, 232500                                                                                                                                                                                                                         |
| GCDH   | Glutaricaciduria, type I, 231670                                                                                                                                                                                                                                                                             |
| GCH1   | Hyperphenylalaninemia, BH4-deficient, B, 233910<br>Dystonia, DOPA-responsive, with or without hyperphenylalaninemia, 128230                                                                                                                                                                                  |
| GDAP2  | Spinocerebellar ataxia, autosomal recessive 27, 618369                                                                                                                                                                                                                                                       |
| GFAP   | Alexander disease, 203450                                                                                                                                                                                                                                                                                    |
| GJC2   | Spastic paraplegia 44, autosomal recessive, 613206<br>Lymphatic malformation 3, 613480<br>Leukodystrophy, hypomyelinating, 2, 608804                                                                                                                                                                         |

|         |                                                                                                                                                                                                                                      |
|---------|--------------------------------------------------------------------------------------------------------------------------------------------------------------------------------------------------------------------------------------|
| GLB1    | GM1-gangliosidosis, type III, 230650<br>GM1-gangliosidosis, type I, 230500<br>Mucopolysaccharidosis type IVB (Morquio), 253010<br>GM1-gangliosidosis, type II, 230600                                                                |
| GNAL    | Dystonia 25, 615073                                                                                                                                                                                                                  |
| GOSR2   | Epilepsy, progressive myoclonic 6, 614018                                                                                                                                                                                            |
| GPR143  | Nystagmus 6, congenital, X-linked, 300814<br>Ocular albinism, type I, Nettleship-Falls type, 300500                                                                                                                                  |
| GRID2   | Spinocerebellar ataxia, autosomal recessive 18, 616204                                                                                                                                                                               |
| GRIN1   | Neurodevelopmental disorder with or without hyperkinetic movements and seizures, autosomal recessive, 617820<br>Neurodevelopmental disorder with or without hyperkinetic movements and seizures, autosomal dominant, 614254          |
| GRIN2B  | Mental retardation, autosomal dominant 6, 613970<br>Developmental and epileptic encephalopathy 27, 616139                                                                                                                            |
| GRM1    | Spinocerebellar ataxia 44, 617691<br>Spinocerebellar ataxia, autosomal recessive 13, 614831                                                                                                                                          |
| HACE1   | Spastic paraplegia and psychomotor retardation with or without seizures, 616756                                                                                                                                                      |
| HEXB    | Sandhoff disease, infantile, juvenile, and adult forms, 268800                                                                                                                                                                       |
| HK1     | Hemolytic anemia due to hexokinase deficiency, 235700<br>Neuropathy, hereditary motor and sensory, Russe type, 605285<br>Neurodevelopmental disorder with visual defects and brain anomalies, 618547 Retinitis pigmentosa 79, 617460 |
| HPDL    | Spastic paraplegia 83, autosomal recessive, 619027<br>Neurodevelopmental disorder with progressive spasticity and brain white matter abnormalities, 619026                                                                           |
| HPRT1   | Hyperuricemia, HRPT-related, 300323 Lesch-Nyhan syndrome, 300322                                                                                                                                                                     |
| HSD17B4 | D-bifunctional protein deficiency, 261515<br>Perrault syndrome 1, 233400                                                                                                                                                             |
| HSPD1   | Spastic paraplegia 13, autosomal dominant, 605280<br>Leukodystrophy, hypomyelinating, 4, 612233                                                                                                                                      |

|           |                                                                                                                                                                                                                                                            |
|-----------|------------------------------------------------------------------------------------------------------------------------------------------------------------------------------------------------------------------------------------------------------------|
| IBA57     | ?Spastic paraplegia 74, autosomal recessive, 616451<br>Multiple mitochondrial dysfunctions syndrome 3, 615330                                                                                                                                              |
| ISCA2     | Multiple mitochondrial dysfunctions syndrome 4, 616370                                                                                                                                                                                                     |
| ITPR1     | Gillespie syndrome, 206700<br>Spinocerebellar ataxia 29, congenital nonprogressive, 117360 Spinocerebellar ataxia 15, 606658                                                                                                                               |
| JAM2      | Basal ganglia calcification, idiopathic, 8, autosomal recessive, 618824                                                                                                                                                                                    |
| JAM3      | Hemorrhagic destruction of the brain, subependymal calcification, and cataracts, 613730                                                                                                                                                                    |
| KATNB1    | Lissencephaly 6, with microcephaly, 616212                                                                                                                                                                                                                 |
| KCNA1     | Episodic ataxia/myokymia syndrome, 160120                                                                                                                                                                                                                  |
| KCNA2     | Developmental and epileptic encephalopathy 32, 616366                                                                                                                                                                                                      |
| KCNC1     | Epilepsy, progressive myoclonic 7, 616187                                                                                                                                                                                                                  |
| KCNC3     | Spinocerebellar ataxia 13, 605259                                                                                                                                                                                                                          |
| KCND3     | Brugada syndrome 9, 616399<br>Spinocerebellar ataxia 19, 607346                                                                                                                                                                                            |
| KCNJ10    | Enlarged vestibular aqueduct, digenic, 600791<br>SESAME syndrome, 612780                                                                                                                                                                                   |
| KCNJ6     | Keppen-Lubinsky syndrome, 614098                                                                                                                                                                                                                           |
| KCNMA1    | Liang-Wang syndrome, 618729<br>{Epilepsy, idiopathic generalized, susceptibility to, 16}, 618596<br>Cerebellar atrophy, developmental delay, and seizures, 617643<br>Paroxysmal nonkinesigenic dyskinesia, 3, with or without generalized epilepsy, 609446 |
| KCTD7     | Epilepsy, progressive myoclonic 3, with or without intracellular inclusions, 611726                                                                                                                                                                        |
| KIDINS220 | Spastic paraplegia, intellectual disability, nystagmus, and obesity, 617296                                                                                                                                                                                |
| KIF1A     | NESCAV syndrome, 614255<br>Spastic paraplegia 30, autosomal dominant, 610357<br>Neuropathy, hereditary sensory, type IIC, 614213<br>Spastic paraplegia 30, autosomal recessive, 610357                                                                     |

|          |                                                                                                                                                                                                                                                                                                                       |
|----------|-----------------------------------------------------------------------------------------------------------------------------------------------------------------------------------------------------------------------------------------------------------------------------------------------------------------------|
| KIF1C    | Spastic ataxia 2, autosomal recessive, 611302                                                                                                                                                                                                                                                                         |
| KIF5A    | Myoclonus, intractable, neonatal, 617235<br>Spastic paraplegia 10, autosomal dominant, 604187<br>{Amyotrophic lateral sclerosis, susceptibility to, 25}, 617921                                                                                                                                                       |
| KMT2B    | Dystonia 28, childhood-onset, 617284                                                                                                                                                                                                                                                                                  |
| L1CAM    | MASA syndrome, 303350<br>Hydrocephalus with Hirschsprung disease, 307000<br>Corpus callosum, partial agenesis of, 304100<br>CRASH syndrome, 303350<br>Hydrocephalus due to aqueductal stenosis, 307000<br>Hydrocephalus with congenital idiopathic intestinal pseudoobstruction, 307000                               |
| LAMA1    | Poretti-Boltshauser syndrome, 615960                                                                                                                                                                                                                                                                                  |
| LAMB1    | Lissencephaly 5, 615191                                                                                                                                                                                                                                                                                               |
| LMNB1    | Leukodystrophy, adult-onset, autosomal dominant, 169500                                                                                                                                                                                                                                                               |
| MAG      | Spastic paraplegia 75, autosomal recessive, 616680                                                                                                                                                                                                                                                                    |
| MAPK8IP3 | Neurodevelopmental disorder with or without variable brain abnormalities, 618443                                                                                                                                                                                                                                      |
| MARS2    | Spastic ataxia 3, autosomal recessive, 611390<br>?Combined oxidative phosphorylation deficiency 25, 616430                                                                                                                                                                                                            |
| MECP2    | Encephalopathy, neonatal severe, 300673 Rett syndrome, atypical, 312750<br>{Autism susceptibility, X-linked 3}, 300496<br>Rett syndrome, 312750<br>Rett syndrome, preserved speech variant, 312750<br>Mental retardation, X-linked syndromic, Lubs type, 300260<br>Mental retardation, X-linked, syndromic 13, 300055 |
| MECR     | Dystonia, childhood-onset, with optic atrophy and basal ganglia abnormalities, 617282                                                                                                                                                                                                                                 |
| MFF      | Encephalopathy due to defective mitochondrial and peroxisomal fission 2, 617086                                                                                                                                                                                                                                       |
| MICU1    | Myopathy with extrapyramidal signs, 615673                                                                                                                                                                                                                                                                            |
| MLC1     | Megalencephalic leukoencephalopathy with subcortical cysts, 604004                                                                                                                                                                                                                                                    |

|        |                                                                                                                                                                                                                                              |
|--------|----------------------------------------------------------------------------------------------------------------------------------------------------------------------------------------------------------------------------------------------|
| MMADHC | Homocystinuria, cblD type, variant 1, 277410<br>Methylmalonic aciduria and homocystinuria, cblD type, 277410<br>Methylmalonic aciduria, cblD type, variant 2, 277410                                                                         |
| MRE11  | Ataxia-telangiectasia-like disorder 1, 604391                                                                                                                                                                                                |
| MTHFR  | {Schizophrenia, susceptibility to}, 181500<br>Homocystinuria due to MTHFR deficiency, 236250<br>{Neural tube defects, susceptibility to}, 601634<br>{Thromboembolism, susceptibility to}, 188050<br>{Vascular disease, susceptibility to}, 0 |
| MTPAP  | ?Spastic ataxia 4, autosomal recessive, 613672                                                                                                                                                                                               |
| MTTP   | Abetalipoproteinemia, 200100<br>{Metabolic syndrome, protection against}, 605552                                                                                                                                                             |
| MYORG  | Basal ganglia calcification, idiopathic, 7, autosomal recessive, 618317                                                                                                                                                                      |
| NANS   | Spondyloepimetaphyseal dysplasia, Camera-Genevieve type, 610442                                                                                                                                                                              |
| NARS2  | ?Deafness, autosomal recessive 94, 618434<br>Combined oxidative phosphorylation deficiency 24, 616239                                                                                                                                        |
| NEFL   | Charcot-Marie-Tooth disease, type 1F, 607734<br>Charcot-Marie-Tooth disease, dominant intermediate G, 617882 Charcot-Marie-Tooth disease, type 2E, 607684                                                                                    |
| NEU1   | Sialidosis, type II, 256550<br>Sialidosis, type I, 256550                                                                                                                                                                                    |
| NEXMIF | Mental retardation, X-linked 98, 300912                                                                                                                                                                                                      |
| NF2    | Meningioma, NF2-related, somatic, 607174<br>Schwannomatosis, somatic, 162091<br>Neurofibromatosis, type 2, 101000                                                                                                                            |
| NGLY1  | Congenital disorder of deglycosylation, 615273                                                                                                                                                                                               |
| NIPA1  | Spastic paraplegia 6, autosomal dominant, 600363                                                                                                                                                                                             |
| NKX2-1 | {Thyroid cancer, nonmedullary, 1}, 188550<br>Chorea, hereditary benign, 118700<br>Choreoathetosis, hypothyroidism, and neonatal respiratory distress, 610978                                                                                 |

|        |                                                                                                                                                                                                                                                                                                                                  |
|--------|----------------------------------------------------------------------------------------------------------------------------------------------------------------------------------------------------------------------------------------------------------------------------------------------------------------------------------|
| NKX6-2 | Spastic ataxia 8, autosomal recessive, with hypomyelinating leukodystrophy, 617560                                                                                                                                                                                                                                               |
| NOL3   | ?Myoclonus, familial, 1, 614937                                                                                                                                                                                                                                                                                                  |
| NPC1   | Niemann-Pick disease, type D, 257220<br>Niemann-Pick disease, type C1, 257220                                                                                                                                                                                                                                                    |
| NPC2   | Niemann-pick disease, type C2, 607625                                                                                                                                                                                                                                                                                            |
| NT5C2  | Spastic paraplegia 45, autosomal recessive, 613162                                                                                                                                                                                                                                                                               |
| NUP62  | Striatonigral degeneration, infantile, 271930                                                                                                                                                                                                                                                                                    |
| OCLN   | Pseudo-TORCH syndrome 1, 251290                                                                                                                                                                                                                                                                                                  |
| OPA1   | {Glaucoma, normal tension, susceptibility to}, 606657<br>Behr syndrome, 210000<br>Optic atrophy 1, 165500<br>Optic atrophy plus syndrome, 125250<br>?Mitochondrial DNA depletion syndrome 14 (encephalocardiomyopathic type), 616896                                                                                             |
| OPHN1  | Mental retardation, X-linked, with cerebellar hypoplasia and distinctive facial appearance, 300486                                                                                                                                                                                                                               |
| PACS2  | Developmental and epileptic encephalopathy 66, 618067                                                                                                                                                                                                                                                                            |
| PANK2  | HARP syndrome, 607236<br>Neurodegeneration with brain iron accumulation 1, 234200                                                                                                                                                                                                                                                |
| PAX6   | Optic nerve hypoplasia, 165550<br>?Coloboma, ocular, 120200<br>Foveal hypoplasia 1, 136520<br>Aniridia, 106210<br>Keratitis, 148190<br>Anterior segment dysgenesis 5, multiple subtypes, 604229<br>Cataract with late-onset corneal dystrophy, 106210<br>?Coloboma of optic nerve, 120430<br>?Morning glory disc anomaly, 120430 |
| PCYT2  | Spastic paraplegia 82, autosomal recessive, 618770                                                                                                                                                                                                                                                                               |
| PDE10A | Dyskinesia, limb and orofacial, infantile-onset, 616921<br>Striatal degeneration, autosomal dominant, 616922                                                                                                                                                                                                                     |

|        |                                                                                                                                                                                                                                                |
|--------|------------------------------------------------------------------------------------------------------------------------------------------------------------------------------------------------------------------------------------------------|
| PDE8B  | Striatal degeneration, autosomal dominant, 609161<br>Pigmented nodular adrenocortical disease, primary, 3, 614190                                                                                                                              |
| PDGFB  | Dermatofibrosarcoma protuberans, 607907<br>Basal ganglia calcification, idiopathic, 5, 615483<br>Meningioma, SIS-related, 607174                                                                                                               |
| PDGFRB | Myeloproliferative disorder with eosinophilia, 131440<br>Basal ganglia calcification, idiopathic, 4, 615007<br>Kosaki overgrowth syndrome, 616592<br>Premature aging syndrome, Penttinen type, 601812<br>Myofibromatosis, infantile, 1, 228550 |
| PDHA1  | Pyruvate dehydrogenase E1-alpha deficiency, 312170                                                                                                                                                                                             |

|        |                                                                                                                                                             |
|--------|-------------------------------------------------------------------------------------------------------------------------------------------------------------|
| PDHX   | Lacticacidemia due to PDX1 deficiency, 245349                                                                                                               |
| PDSS1  | Coenzyme Q10 deficiency, primary, 2, 614651                                                                                                                 |
| PDSS2  | Coenzyme Q10 deficiency, primary, 3, 614652                                                                                                                 |
| PDYN   | Spinocerebellar ataxia 23, 610245                                                                                                                           |
| PEX10  | Peroxisome biogenesis disorder 6B, 614871<br>Peroxisome biogenesis disorder 6A (Zellweger), 614870                                                          |
| PEX2   | Peroxisome biogenesis disorder 5A (Zellweger), 614866<br>Peroxisome biogenesis disorder 5B, 614867                                                          |
| PEX7   | Peroxisome biogenesis disorder 9B, 614879<br>Rhizomelic chondrodysplasia punctata, type 1, 215100                                                           |
| PHYH   | Refsum disease, 266500                                                                                                                                      |
| PIK3R5 | Ataxia-oculomotor apraxia 3, 615217                                                                                                                         |
| PLA2G6 | Infantile neuroaxonal dystrophy 1, 256600<br>Parkinson disease 14, autosomal recessive, 612953<br>Neurodegeneration with brain iron accumulation 2B, 610217 |
| PLP1   | Pelizaeus-Merzbacher disease, 312080<br>Spastic paraplegia 2, X-linked, 312920                                                                              |
| PMM2   | Congenital disorder of glycosylation, type Ia, 212065                                                                                                       |

|          |                                                                                                                                                                                                                                                                                                                                                         |
|----------|---------------------------------------------------------------------------------------------------------------------------------------------------------------------------------------------------------------------------------------------------------------------------------------------------------------------------------------------------------|
| PMP22    | Dejerine-Sottas disease, 145900<br>?Neuropathy, inflammatory demyelinating, 139393<br>Charcot-Marie-Tooth disease, type 1E, 118300<br>Roussy-Levy syndrome, 180800<br>Neuropathy, recurrent, with pressure palsies, 162500<br>Charcot-Marie-Tooth disease, type 1A, 118220                                                                              |
| PMPCA    | Spinocerebellar ataxia, autosomal recessive 2, 213200                                                                                                                                                                                                                                                                                                   |
| PNKD     | Paroxysmal nonkinesigenic dyskinesia 1, 118800                                                                                                                                                                                                                                                                                                          |
| PNKP     | Microcephaly, seizures, and developmental delay, 613402<br>Ataxia-oculomotor apraxia 4, 616267<br>?Charcot-Marie-Tooth disease, type 2B2, 605589                                                                                                                                                                                                        |
| PNPLA6   | Spastic paraplegia 39, autosomal recessive, 612020<br>Boucher-Neuhauser syndrome, 215470<br>Oliver-McFarlane syndrome, 275400<br>?Laurence-Moon syndrome, 245800                                                                                                                                                                                        |
| POLG     | Progressive external ophthalmoplegia, autosomal dominant 1, 157640<br>Mitochondrial DNA depletion syndrome 4B (MNGIE type), 613662<br>Mitochondrial recessive ataxia syndrome (includes SANDO and SCAE), 607459<br>Mitochondrial DNA depletion syndrome 4A (Alpers type), 203700<br>Progressive external ophthalmoplegia, autosomal recessive 1, 258450 |
| POLR1C   | Treacher Collins syndrome 3, 248390<br>Leukodystrophy, hypomyelinating, 11, 616494                                                                                                                                                                                                                                                                      |
| POLR3A   | Leukodystrophy, hypomyelinating, 7, with or without oligodontia and/or hypogonadotropic hypogonadism, 607694<br>Wiedemann-Rautenstrauch syndrome, 264090                                                                                                                                                                                                |
| POLR3B   | Leukodystrophy, hypomyelinating, 8, with or without oligodontia and/or hypogonadotropic hypogonadism, 614381                                                                                                                                                                                                                                            |
| PRF1     | Hemophagocytic lymphohistiocytosis, familial, 2, 603553<br>Aplastic anemia, 609135<br>Lymphoma, non-Hodgkin, 605027                                                                                                                                                                                                                                     |
| PRICKLE1 | Epilepsy, progressive myoclonic 1B, 612437                                                                                                                                                                                                                                                                                                              |
| PRKCG    | Spinocerebellar ataxia 14, 605361                                                                                                                                                                                                                                                                                                                       |



|          |                                                                                                                                                                          |
|----------|--------------------------------------------------------------------------------------------------------------------------------------------------------------------------|
| PRKRA    | Dystonia 16, 612067                                                                                                                                                      |
| PRRT2    | Episodic kinesigenic dyskinesia 1, 128200<br>Seizures, benign familial infantile, 2, 605751<br>Convulsions, familial infantile, with paroxysmal choreoathetosis, 602066  |
| PSAP     | Gaucher disease, atypical, 610539<br>Krabbe disease, atypical, 611722<br>Combined SAP deficiency, 611721<br>Metachromatic leukodystrophy due to SAP-b deficiency, 249900 |
| PTRH2    | Infantile-onset multisystem neurologic, endocrine, and pancreatic disease, 616263                                                                                        |
| PTS      | Hyperphenylalaninemia, BH4-deficient, A, 261640                                                                                                                          |
| PUM1     | Spinocerebellar ataxia 47, 617931                                                                                                                                        |
| PYCR2    | Leukodystrophy, hypomyelinating, 10, 616420                                                                                                                              |
| QDPR     | Hyperphenylalaninemia, BH4-deficient, C, 261630                                                                                                                          |
| RAB18    | Warburg micro syndrome 3, 614222                                                                                                                                         |
| RAB3GAP1 | Warburg micro syndrome 1, 600118                                                                                                                                         |
| RAB3GAP2 | Warburg micro syndrome 2, 614225<br>Martsolf syndrome, 212720                                                                                                            |
| RAD51    | {Breast cancer, susceptibility to}, 114480<br>Mirror movements 2, 614508<br>Fanconi anemia, complementation group R, 617244                                              |
| RARS1    | Leukodystrophy, hypomyelinating, 9, 616140                                                                                                                               |
| RARS2    | Pontocerebellar hypoplasia, type 6, 611523                                                                                                                               |
| REEP1    | Spastic paraplegia 31, autosomal dominant, 610250<br>?Neuronopathy, distal hereditary motor, type VB, 614751                                                             |
| RNASEH2A | Aicardi-Goutieres syndrome 4, 610333                                                                                                                                     |
| RNASEH2B | Aicardi-Goutieres syndrome 2, 610181                                                                                                                                     |
| RNASEH2C | Aicardi-Goutieres syndrome 3, 610329                                                                                                                                     |

|         |                                                                                                                                                                                                              |
|---------|--------------------------------------------------------------------------------------------------------------------------------------------------------------------------------------------------------------|
| RNF170  | Ataxia, sensory, 1, autosomal dominant, 608984                                                                                                                                                               |
| RNF216  | Cerebellar ataxia and hypogonadotropic hypogonadism, 212840                                                                                                                                                  |
| RTN2    | Spastic paraplegia 12, autosomal dominant, 604805                                                                                                                                                            |
| RUBCN   | Spinocerebellar ataxia, autosomal recessive 15, 615705                                                                                                                                                       |
| SACS    | Spastic ataxia, Charlevoix-Saguenay type, 270550                                                                                                                                                             |
| SAMD9L  | Monosomy 7 myelodysplasia and leukemia syndrome 1, 252270 Ataxia-pancytopenia syndrome, 159550                                                                                                               |
| SAMHD1  | ?Chilblain lupus 2, 614415<br>Aicardi-Goutieres syndrome 5, 612952                                                                                                                                           |
| SCN11A  | Neuropathy, hereditary sensory and autonomic, type VII, 615548<br>Episodic pain syndrome, familial, 3, 615552                                                                                                |
| SCN1A   | Febrile seizures, familial, 3A, 604403<br>Migraine, familial hemiplegic, 3, 609634<br>Dravet syndrome, 607208<br>Epilepsy, generalized, with febrile seizures plus, type 2, 604403                           |
| SCN2A   | Episodic ataxia, type 9, 618924<br>Developmental and epileptic encephalopathy 11, 613721<br>Seizures, benign familial infantile, 3, 607745                                                                   |
| SCN8A   | Seizures, benign familial infantile, 5, 617080<br>Developmental and epileptic encephalopathy 13, 614558<br>Cognitive impairment with or without cerebellar ataxia, 614306<br>?Myoclonus, familial, 2, 618364 |
| SEPSECS | Pontocerebellar hypoplasia type 2D, 613811                                                                                                                                                                   |
| SERAC1  | 3-methylglutaconic aciduria with deafness, encephalopathy, and Leigh-like syndrome, 614739                                                                                                                   |
| SETX    | Spinocerebellar ataxia, autosomal recessive, with axonal neuropathy 2, 606002<br>Amyotrophic lateral sclerosis 4, juvenile, 602433                                                                           |
| SGCE    | Dystonia-11, myoclonic, 159900                                                                                                                                                                               |
| SIL1    | Marinesco-Sjogren syndrome, 248800                                                                                                                                                                           |
| SLC12A6 | Agenesis of the corpus callosum with peripheral neuropathy, 218000                                                                                                                                           |

|          |                                                                                                                                                                                                                                                                                        |
|----------|----------------------------------------------------------------------------------------------------------------------------------------------------------------------------------------------------------------------------------------------------------------------------------------|
| SLC16A2  | Allan-Herndon-Dudley syndrome, 300523                                                                                                                                                                                                                                                  |
| SLC19A3  | Thiamine metabolism dysfunction syndrome 2 (biotin- or thiamine-responsive encephalopathy type 2), 607483                                                                                                                                                                              |
| SLC1A3   | Episodic ataxia, type 6, 612656                                                                                                                                                                                                                                                        |
| SLC20A2  | Basal ganglia calcification, idiopathic, 1, 213600                                                                                                                                                                                                                                     |
| SLC25A15 | Hyperornithinemia-hyperammonemia-homocitrullinemia syndrome, 238970                                                                                                                                                                                                                    |
| SLC2A1   | Dystonia 9, 601042<br>GLUT1 deficiency syndrome 1, infantile onset, severe, 606777<br>Stomatin-deficient cryohydrocytosis with neurologic defects, 608885<br>GLUT1 deficiency syndrome 2, childhood onset, 612126<br>{Epilepsy, idiopathic generalized, susceptibility to, 12}, 614847 |
| SLC30A10 | Hypermanganesemia with dystonia 1, 613280                                                                                                                                                                                                                                              |
| SLC33A1  | Spastic paraplegia 42, autosomal dominant, 612539<br>Congenital cataracts, hearing loss, and neurodegeneration, 614482                                                                                                                                                                 |
| SLC39A14 | ?Hyperostosis cranialis interna, 144755<br>Hypermanganesemia with dystonia 2, 617013                                                                                                                                                                                                   |
| SLC52A2  | Brown-Vialetto-Van Laere syndrome 2, 614707                                                                                                                                                                                                                                            |
| SLC52A3  | Brown-Vialetto-Van Laere syndrome 1, 211530 ?Fazio-Londe disease, 211500                                                                                                                                                                                                               |
| SLC6A3   | {Nicotine dependence, protection against}, 188890<br>Parkinsonism-dystonia, infantile, 1, 613135                                                                                                                                                                                       |
| SLC9A1   | Lichtenstein-Knorr syndrome, 616291                                                                                                                                                                                                                                                    |
| SMDT1    | No OMIM disease ID                                                                                                                                                                                                                                                                     |
| SMPD1    | Niemann-Pick disease, type A, 257200 Niemann-Pick disease, type B, 607616                                                                                                                                                                                                              |
| SNCA     | Dementia, Lewy body, 127750<br>Parkinson disease 1, 168601<br>Parkinson disease 4, 605543                                                                                                                                                                                              |
| SNORD118 | Leukoencephalopathy, brain calcifications, and cysts, 614561                                                                                                                                                                                                                           |

|         |                                                                                                                                                                                         |
|---------|-----------------------------------------------------------------------------------------------------------------------------------------------------------------------------------------|
| SNX14   | Spinocerebellar ataxia, autosomal recessive 20, 616354                                                                                                                                  |
| SOX10   | Waardenburg syndrome, type 2E, with or without neurologic involvement, 611584<br>PCWH syndrome, 609136<br>Waardenburg syndrome, type 4C, 613266                                         |
| SPART   | Troyer syndrome, 275900                                                                                                                                                                 |
| SPAST   | Spastic paraplegia 4, autosomal dominant, 182601                                                                                                                                        |
| SPG11   | Charcot-Marie-Tooth disease, axonal, type 2X, 616668<br>Spastic paraplegia 11, autosomal recessive, 604360<br>Amyotrophic lateral sclerosis 5, juvenile, 602099                         |
| SPG21   | Mast syndrome, 248900                                                                                                                                                                   |
| SPG7    | Spastic paraplegia 7, autosomal recessive, 607259                                                                                                                                       |
| SPR     | Dystonia, dopa-responsive, due to sepiapterin reductase deficiency, 612716                                                                                                              |
| SPTBN2  | Spinocerebellar ataxia, autosomal recessive 14, 615386<br>Spinocerebellar ataxia 5, 600224                                                                                              |
| STUB1   | Spinocerebellar ataxia, autosomal recessive 16, 615768 ?Spinocerebellar ataxia 48, 618093                                                                                               |
| SUMF1   | Multiple sulfatase deficiency, 272200                                                                                                                                                   |
| SUOX    | Sulfite oxidase deficiency, 272300                                                                                                                                                      |
| SYNE1   | Arthrogryposis multiplex congenita 3, myogenic type, 618484<br>Spinocerebellar ataxia, autosomal recessive 8, 610743<br>Emery-Dreifuss muscular dystrophy 4, autosomal dominant, 612998 |
| TAF1    | Dystonia-Parkinsonism, X-linked, 314250<br>Mental retardation, X-linked, syndromic 33, 300966                                                                                           |
| TANGO2  | Metabolic encephalomyopathic crises, recurrent, with rhabdomyolysis, cardiac arrhythmias, and neurodegeneration, 616878                                                                 |
| TBC1D20 | Warburg micro syndrome 4, 615663                                                                                                                                                        |
| TBC1D23 | Pontocerebellar hypoplasia, type 11, 617695                                                                                                                                             |
| TBCD    | Encephalopathy, progressive, early-onset, with brain atrophy and thin corpus callosum, 617193                                                                                           |

|          |                                                                                                                                                                                                                     |
|----------|---------------------------------------------------------------------------------------------------------------------------------------------------------------------------------------------------------------------|
| TDP1     | ?Spinocerebellar ataxia, autosomal recessive, with axonal neuropathy 1, 607250                                                                                                                                      |
| TDP2     | Spinocerebellar ataxia, autosomal recessive 23, 616949                                                                                                                                                              |
| TECPR2   | Spastic paraplegia 49, autosomal recessive, 615031                                                                                                                                                                  |
| TENM4    | Essential tremor, hereditary, 5, 616736                                                                                                                                                                             |
| TGM6     | Spinocerebellar ataxia 35, 613908                                                                                                                                                                                   |
| TH       | Segawa syndrome, recessive, 605407                                                                                                                                                                                  |
| THAP1    | Dystonia 6, torsion, 602629                                                                                                                                                                                         |
| TIMM8A   | Mohr-Tranebjaerg syndrome, 304700                                                                                                                                                                                   |
| TMEM106B | Leukodystrophy, hypomyelinating, 16, 617964                                                                                                                                                                         |
| TMEM240  | Spinocerebellar ataxia 21, 607454                                                                                                                                                                                   |
| TMEM67   | Meckel syndrome 3, 607361<br>COACH syndrome 1, 216360<br>?RHYNS syndrome, 602152<br>Nephronophthisis 11, 613550<br>{Bardet-Biedl syndrome 14, modifier of}, 615991<br>Joubert syndrome 6, 610688                    |
| TOE1     | Pontocerebellar hypoplasia, type 7, 614969                                                                                                                                                                          |
| TOR1A    | Dystonia-1, torsion, 128100<br>Arthrogryposis multiplex congenita 5, 618947<br>{Dystonia-1, modifier of}, 0                                                                                                         |
| TPP1     | Spinocerebellar ataxia, autosomal recessive 7, 609270<br>Ceroid lipofuscinosis, neuronal, 2, 204500                                                                                                                 |
| TREM2    | Polycystic lipomembranous osteodysplasia with sclerosing leukoencephalopathy 2, 618193                                                                                                                              |
| TREX1    | {Systemic lupus erythematosus, susceptibility to}, 152700<br>Vasculopathy, retinal, with cerebral leukodystrophy, 192315<br>Aicardi-Goutieres syndrome 1, dominant and recessive, 225750<br>Chilblain lupus, 610448 |

|        |                                                                                                                                                                                                                     |
|--------|---------------------------------------------------------------------------------------------------------------------------------------------------------------------------------------------------------------------|
| TRPM3  | No OMIM disease ID                                                                                                                                                                                                  |
| TSEN15 | Pontocerebellar hypoplasia, type 2F, 617026                                                                                                                                                                         |
| TSEN2  | Pontocerebellar hypoplasia type 2B, 612389                                                                                                                                                                          |
| TSEN54 | Pontocerebellar hypoplasia type 4, 225753<br>Pontocerebellar hypoplasia type 2A, 277470<br>?Pontocerebellar hypoplasia type 5, 610204                                                                               |
| TTBK2  | Spinocerebellar ataxia 11, 604432                                                                                                                                                                                   |
| TTC19  | Mitochondrial complex III deficiency, nuclear type 2, 615157                                                                                                                                                        |
| TTPA   | Ataxia with isolated vitamin E deficiency, 277460                                                                                                                                                                   |
| TUBA1A | Lissencephaly 3, 611603                                                                                                                                                                                             |
| TUBB   | Symmetric circumferential skin creases, congenital, 1, 156610<br>Cortical dysplasia, complex, with other brain malformations 6, 615771                                                                              |
| TUBB4A | Leukodystrophy, hypomyelinating, 6, 612438<br>Dystonia 4, torsion, autosomal dominant, 128101                                                                                                                       |
| TUBG1  | Cortical dysplasia, complex, with other brain malformations 4, 615412                                                                                                                                               |
| TWINK  | Mitochondrial DNA depletion syndrome 7 (hepatocerebral type), 271245<br>Progressive external ophthalmoplegia with mitochondrial DNA deletions, autosomal dominant 3, 609286<br>Perrault syndrome 5, 616138          |
| TYROBP | Polycystic lipomembranous osteodysplasia with sclerosing leukoencephalopathy 1, 221770                                                                                                                              |
| UBAP1  | Spastic paraplegia 80, autosomal dominant, 618418                                                                                                                                                                   |
| UBTF   | Neurodegeneration, childhood-onset, with brain atrophy, 617672                                                                                                                                                      |
| VAMP1  | Spastic ataxia 1, autosomal dominant, 108600<br>Myasthenic syndrome, congenital, 25, 618323                                                                                                                         |
| VAR2   | Combined oxidative phosphorylation deficiency 20, 615917                                                                                                                                                            |
| VCP    | Inclusion body myopathy with early-onset Paget disease and frontotemporal dementia 1, 167320 Charcot-Marie-Tooth disease, type 2Y, 616687<br>Frontotemporal dementia and/or amyotrophic lateral sclerosis 6, 613954 |

|         |                                                                                                                                                                        |
|---------|------------------------------------------------------------------------------------------------------------------------------------------------------------------------|
| VLDLR   | Cerebellar hypoplasia and mental retardation with or without quadrupedal locomotion 1, 224050                                                                          |
| VPS11   | Leukodystrophy, hypomyelinating, 12, 616683                                                                                                                            |
| VPS13A  | Choreoacanthocytosis, 200150                                                                                                                                           |
| VPS13D  | Spinocerebellar ataxia, autosomal recessive 4, 607317                                                                                                                  |
| VPS16   | No OMIM disease ID                                                                                                                                                     |
| VPS37A  | Spastic paraplegia 53, autosomal recessive, 614898                                                                                                                     |
| VPS53   | Pontocerebellar hypoplasia, type 2E, 615851                                                                                                                            |
| VRK1    | Pontocerebellar hypoplasia type 1A, 607596                                                                                                                             |
| WASHC5  | Ritscher-Schinzel syndrome 1, 220210<br>Spastic paraplegia 8, autosomal dominant, 603563                                                                               |
| WDR26   | Skraban-Deardorff syndrome, 617616                                                                                                                                     |
| WDR45   | Neurodegeneration with brain iron accumulation 5, 300894                                                                                                               |
| WDR73   | Galloway-Mowat syndrome 1, 251300                                                                                                                                      |
| WDR81   | Hydrocephalus, congenital, 3, with brain anomalies, 617967<br>Cerebellar ataxia, mental retardation, and dysequilibrium syndrome 2, 610185                             |
| WWOX    | Spinocerebellar ataxia, autosomal recessive 12, 614322<br>Esophageal squamous cell carcinoma, somatic, 133239<br>Developmental and epileptic encephalopathy 28, 616211 |
| XK      | McLeod syndrome with or without chronic granulomatous disease, 300842                                                                                                  |
| XPR1    | Basal ganglia calcification, idiopathic, 6, 616413                                                                                                                     |
| XRCC1   | ?Spinocerebellar ataxia, autosomal recessive 26, 617633                                                                                                                |
| ZC4H2   | Wieacker-Wolff syndrome, 314580<br>Wieacker-Wolff syndrome, female-restricted, 301041                                                                                  |
| ZFYVE26 | Spastic paraplegia 15, autosomal recessive, 270700                                                                                                                     |
| ZFYVE27 | Spastic paraplegia 33, autosomal dominant, 610244                                                                                                                      |

|        |                    |
|--------|--------------------|
| ZNF592 | No OMIM disease ID |
|--------|--------------------|

\*Disease IDs and phenotype descriptions according to OMIM, release version November 20th, 2020.

“No OMIM Disease ID” indicates that the gene lacks a disease description in OMIM. “{...}” indicates that the gene has variants that are risk factors for the described condition.
